# Supplementary material for: Survival and causes of death in extremely preterm infants in the Netherlands
Source: PubMed Central journal article supplement — Arch Dis Child Fetal Neonatal Ed. 2020 Nov 6;106(3):251–7. doi: 10.1136/archdischild-2020-318978 (PMC8070636; doi:10.1136/archdischild-2020-318978), 2020-11-06
Supplement: archdischild-2020-318978supp001.pdf [file archdischild-2020-318978supp001.pdf]

| Variable                              | 2011-2014  | 2015-2017  | p-value |
|---------------------------------------|------------|------------|---------|
| N admissions                          | 1270       | 851        |         |
| N died (%)                            | 377 (29.7) | 226 (26.6) |         |
| Cause of death                        |            |            | 0.117   |
| <i>NEC</i>                            | 96 (25.5)  | 72 (31.9)  |         |
| <i>RDS</i>                            | 78 (20.7)  | 37 (16.4)  |         |
| <i>Severe intracranial hemorrhage</i> | 61 (16.2)  | 39 (17.3)  |         |
| <i>Infection</i>                      | 55 (14.6)  | 41 (18.1)  |         |
| <i>BPD</i>                            | 50 (13.3)  | 15 (6.6)   |         |
| <i>Other</i>                          | 24 (6.4)   | 17 (7.5)   |         |
| <i>Congenital malformation</i>        | 7 (1.9)    | 1 (0.4)    |         |
| <i>Immaturity</i>                     | 3 (0.8)    | 2 (0.9)    |         |
| <i>Non-classifiable</i>               | 3 (0.8)    | 2 (0.9)    |         |
| Death complicated or caused by:       |            |            |         |
| <i>Respiratory problems</i>           | 128 (34.0) | 52 (23.0)  | 0.006*  |
| <i>Infection</i>                      | 124 (32.9) | 86 (38.1)  | 0.230   |
| <i>Central nervous system injury</i>  | 96 (25.5)  | 64 (28.3)  | 0.501   |

*Supplemental 1. Causes of mortality for admitted infants born with a gestational age between 24+0 and 26+6 weeks between 2011 and 2017, compared between two periods. Results are presented as N (%). Death complicated or caused by infection includes categories RDS with infection, BPD with infection, suspected sepsis/infection, proven sepsis/infection, NEC with sepsis and severe IVH with infection culture proven or suspected; death complicated or caused by respiratory problems includes all categories with RDS or BPD; death complicated or caused by central nervous system injury includes categories RDS with severe IVH, BPD with severe IVH, severe IVH, severe IVH with infection culture proven or suspected and from category "other" cPVL, severe cerebral damage, damage due to asphyxia and congenital CMV. NEC: necrotizing enterocolitis, RDS: respiratory distress syndrome, BPD: bronchopulmonary dysplasia, IVH: intraventricular hemorrhage, cPVL: cystic periventricular leukomalacia, CMV: cytomegalovirus.*
